# Supplementary material for: A Fused Deep Learning Approach to Transform Novel Drug Repositioning
Source: Research Square preprint supplement (doi:10.21203/rs.3.rs-5416722/v1), 2024-11-27
Supplement: Supplementary file 1 [file a0ae5f48164b81866e39425a.docx]

**Supplementary Information**

**A Fused Deep Learning Approach to Transform Novel Drug Repositioning**

Kun Li1,2,4, Jiacai Yi1,3, Qing Ye3, Xixi Yang5, Long Yu4, YouChao Deng1, Chengkun Wu3, Tingjun Hou2*, Dejun Jiang1* & Dongsheng Cao1* [[1]](#footnote-0)

1. KGE Method

TransE1 aims to embed entities and relationships in low-dimensional vector spaces within multi-relational data. The goal is to create a simple, parameter-efficient model that can scale efficiently to large databases. TransE represents relationships as translations on low-dimensional embeddings of entities. The scoring function is. Where h, r, t are embeddings of head, relation, tail.

AutoSF2 tackles the task of crafting efficient scoring functions (SFs) for knowledge graphs (KGs). Drawing inspiration from automated machine learning (AutoML), the researchers introduce a unified representation for widely-used SFs. They utilize a greedy algorithm, enhanced with a filter and predictor, to expedite the search process. AutoSF adopts a two-stage strategy for automating the development of an optimal data-dependent scoring function. In the initial stage, it learns a set of model parameters that converge on the training set. The subsequent stage involves seeking a more effective scoring scheme on the validation set.

ComplEx3 utilizing complex-valued embeddings, connected to unitary diagonalization. The theoretical underpinning establishes that all real square matrices fall within the realm of unitarily diagonalizable matrices. ComplEx represents nodes in complex space and scores the real part of the relation matrix, i.e., where is the complex conjugate of the tail vector .

In DistMult4, entities are represented as low-dimensional vectors learned from a neural network, and relations are modeled through bilinear and/or linear mapping functions. The relation matrix is constrained to be a diagonal matrix, specifically capturing only symmetric relations. The scoring function is expressed as .

PairRE5 employs paired vectors for each relation representation, allowing for adaptive margin adjustment in the loss function to address complex relations. The corresponding scoring function is , where and is the embedding of relation.

TripleRE6 divide the relationship vector into three parts: ,,.we refer to the first version for TripleRE, the scoring function is .

RotatE7 addresses the challenge of learning representations for entities and relations in knowledge graphs to predict missing links. The key to success lies in effectively modeling and inferring relation patterns. In RotatE, each relation is represented as a rotation in the complex vector space from the source entity to the target entity. The scoring function is .

InterHT8 facilitates improved interaction between head and tail entities, resulting in enhanced entity representations. The scoring function is ,where is auxiliary tail entity vector,is auxiliary tail entity vector. is unit vector.

1. Recommendation Method

BPR (Bayesian Personalized Ranking)9 is a prominent algorithm crafted for item recommendation tasks, particularly in scenarios with implicit feedback like clicks or purchases. Diverging from traditional methods such as matrix factorization (MF) or adaptive k-nearest-neighbor (KNN) that are mainly geared towards personalized ranking, BPR introduces a generic optimization criterion, BPR-Opt. This criterion, derived from Bayesian analysis as the maximum posterior estimator, uniquely addresses the challenge of direct optimization for ranking in existing methods.

ConvNCF10 introduces ONCF, a novel multi-layer neural network architecture for collaborative filtering. ONCF employs an outer product to explicitly model pairwise correlations within the embedding space, resulting in a more expressive and semantically plausible two-dimensional interaction map. Additionally, ONCF incorporates a convolutional neural network to capture high-order correlations among embedding dimensions.

DMF11 (Deep Matrix Factorization) is a novel matrix factorization model with a neural network architecture designed. DMF introduces a deep structure learning architecture. Initially, a user-item matrix is constructed, incorporating both explicit ratings and non-preference implicit feedback. The deep structure learning architecture is then applied to this matrix, facilitating the learning of a common low-dimensional space for user and item representations.

Factorization Machines12 (FM) combine the flexibility of Support Vector Machines (SVM) with factorization models, offering a general predictor for any real-valued feature vector. FMs efficiently model interactions between variables using factorized parameters, making them adept at handling problems with substantial sparsity Notably, FMs allow linear-time calculation of the model equation, enabling direct optimization without the need for a dual form transformation or support vectors, providing advantages in parameter estimation, particularly in sparse settings.

Neural Factorization Machine 13(NFM) is proposed as a novel model designed for predictive tasks in sparse settings. NFM seamlessly integrates the linearity of Factorization Machines (FM) for modeling second-order feature interactions with the non-linearity of neural networks to capture higher-order feature interactions. Conceptually, NFM proves to be more expressive than FM, with FM being a special case of NFM without hidden layers.

Attentional Factorization Machine 14(AFM) is an enhancement to traditional Factorization Machines (FMs), addressing the limitation of uniform weighting for feature interactions. Unlike FMs, AFM incorporates a neural attention network to discern the importance of different feature interactions, leading to improved predictive performance.

**Supplementary Table 1.** Overview of the baseline methods.

| Model | Category | Method | Data |
| --- | --- | --- | --- |
| RF | Classical machine learning | Employs multiple decision trees to enhance prediction accuracy. | Similarity feature; |
| LR | Classical machine learning | A classic classification algorithm that learns feature weights to make predictions. | Similarity feature; |
| KNN | Classical machine learning | An instance-based learning algorithm that predicts based on the K most similar samples. | Similarity feature; |
| DeepDR | Network-based deep learning | A deep learning method based on autoencoder and Conditional Variational Autoencoder (CVAE). | Similarity feature; drug related networks |
| HAN | Deep learning | A novel heterogeneous graph neural network based on hierarchical attention. | Similarity feature; drug disease association |
| RGCN | Deep learning | A deep learning method utilizing a graph convolutional network. | Similarity feature; drug disease association |
| HGT | Deep learning | A deep learning method based on graph neural networks with a transformer architecture. | Similarity feature; drug disease association |
| EKGDR | Deep learning | An end-to-end knowledge graph-based method | KG; drug disease association |
| DREAMwalk | Deep learning | Biomedical knowledge graph learning by extending guilt-by-association to multiple layers | KG; drug disease association |
| KGCNH | Deep learning | Knowledge graph convolutional network with heuristic search | KG; drug disease association |

**Supplementary Table 2.** Introduction to the Databases Used in the Knowledge Graph.

| **Database/Platform** | **Description** |
| --- | --- |
| OpenTargets | A platform that combines biological and genetic data to help find potential drug targets. |
| DrugBank | A database that provides detailed information about drugs, drug targets, metabolic pathways, and interactions. |
| DisGeNET | A disease-gene association database that collects and integrates genetic and functional information to study gene-disease relationships. |
| DrugCentral | A drug information integration platform that provides detailed information about drugs, drug targets, clinical trials, and FDA-approved drugs. |
| CTD | A chemical genomics database that provides information on the effects of chemicals on genes and proteins, as well as related diseases. |
| UMLS | A medical terminology integration system that integrates various medical vocabularies and classification systems to facilitate semantic searches. |
| ChEMBL | A bioactive molecule database that collects and integrates information about bio-molecule structures, activities, and properties. |
| BindingDB | A protein-small molecule interaction database that provides information on binding affinity, binding constant, and other related information. |
| UniProt | A protein sequence and function database that provides basic information, functional annotations, and interaction information for proteins. |
| PDBbind | A protein-ligand binding data set that provides information on protein structures and small molecule ligands. |
| PubChem | A compound information database that collects and integrates information on compound structures, physical and chemical properties, and activities. |
| STRING | A protein-protein interaction network database that provides information on protein-protein interactions, helping to understand the functions and regulatory mechanisms of proteins in cells. |

**Supplementary Table 3.** Summary of Knowledge Graph Node Types and Numbers.

| Node Type | Number |
| --- | --- |
| target | 80336 |
| chemical | 1009385 |
| gene | 16466 |
| disease | 53503 |
| protein | 1113584 |
| GO | 26816 |
| pathway | 2065 |
| variant | 18096 |
| drug | 6115 |
| sum | 2326366 |

**Supplementary Table 4.** Summary of Knowledge Graph Relationship Types and Numbers.

| Node Type | Number |
| --- | --- |
| target-chemical | 1610048 |
| chemical-target-activate | 67003069 |
| chemical-gene | 1159817 |
| comment-interaction | 214271 |
| target-target | 11648948 |
| disease-pathway | 290209 |
| gene-disease | 30414636 |
| disease-variant | 25564 |
| drug-disease | 339753 |
| chemical-disease | 2061166 |
| drug-target | 8902950 |
| disease-disease | 804784 |
| GO | 294186 |
| target-disease | 32569302 |
| sum | 157338703 |

**Supplementary Table 5.** Cross-validation results of different models on benchmark datasets.

|  | RepoData | | RepoAPP | | RepoClin | | Cold Start | |
| --- | --- | --- | --- | --- | --- | --- | --- | --- |
| auc | aupr | auc | aupr | auc | aupr | auc | aupr |
| KNN | 0.939±0.003 | 0.953±0.002 | 0.812±0.014 | 0.822±0.014 | 0.957±0.003 | 0.967±0.002 | 0.602±0.024 | 0.700±0.017 |
| RF | 0.970±0.002 | 0.976±0.001 | 0.886±0.010 | 0.901±0.010 | 0.982±0.001 | 0.985±0.001 | 0.695±0.057 | 0.776±0.030 |
| HGT | 0.979±0.001 | 0.982±0.001 | 0.949±0.007 | 0.957±0.007 | 0.974±0.002 | 0.977±0.001 | 0.547±0.020 | 0.596±0.011 |
| HAN | 0.955±0.003 | 0.959±0.002 | 0.878±0.013 | 0.876±0.016 | 0.959±0.003 | 0.964±0.003 | 0.478±0.008 | 0.522±0.006 |
| UKEDR | 0.988±0.001 | 0.990±0.001 | 0.958±0.005 | 0.968±0.003 | 0.989±0.001 | 0.991±0.001 | 0.950±0.007 | 0.961±0.005 |
| LR | 0.943±0.003 | 0.955±0.002 | 0.818±0.011 | 0.835±0.011 | 0.962±0.002 | 0.969±0.002 | 0.600±0.018 | 0.688±0.013 |
| RGCN | 0.964±0.002 | 0.968±0.002 | 0.922±0.007 | 0.930±0.007 | 0.966±0.002 | 0.970±0.002 | 0.486±0.018 | 0.561±0.009 |
| DEEPDR | 0.978±0.002 | 0.984±0.001 | 0.942±0.006 | 0.956±0.004 | 0.983±0.001 | 0.987±0.001 | 0.654±0.025 | 0.702±0.022 |
| DREAMwalk | 0.939±0.005 | 0.911±0.007 | 0.884±0.017 | 0.897±0.016 | 0.927±0.004 | 0.877±0.010 | 0.871±0.006 | 0.774±0.011 |
| EKGDR | 0.976±0.002 | 0.978±0.001 | 0.925±0.004 | 0.930±0.005 | 0.979±0.002 | 0.976±0.003 | / | / |
| KGCNH | 0.930±0.002 | 0.944±0.001 | 0.798±0.009 | 0.810±0.009 | 0.948±0.002 | 0.959±0.002 | / | / |

**Supplementary Table 6.** Cross-validation results of different models on Cdataset (1:1).

|  | AUC1 | AUC2 | AUC3 | AUC4 | AUC5 | AUPR1 | AUPR2 | AUPR3 | AUPR4 | AUPR5 |
| --- | --- | --- | --- | --- | --- | --- | --- | --- | --- | --- |
| UKEDR | 0.880 | 0.880 | 0.907 | 0.869 | 0.903 | 0.900 | 0.830 | 0.904 | 0.887 | 0.930 |
| DeepDR | 0.883 | 0.865 | 0.893 | 0.896 | 0.891 | 0.834 | 0.805 | 0.842 | 0.870 | 0.832 |
| RF | 0.741 | 0.748 | 0.748 | 0.758 | 0.753 | 0.684 | 0.697 | 0.696 | 0.705 | 0.701 |
| KNN | 0.781 | 0.764 | 0.783 | 0.788 | 0.751 | 0.755 | 0.736 | 0.757 | 0.765 | 0.733 |
| LR | 0.768 | 0.722 | 0.704 | 0.750 | 0.767 | 0.771 | 0.707 | 0.692 | 0.749 | 0.745 |
| RGCN | 0.708 | 0.697 | 0.713 | 0.667 | 0.691 | 0.697 | 0.692 | 0.686 | 0.647 | 0.704 |
| HAN | 0.721 | 0.688 | 0.741 | 0.674 | 0.732 | 0.704 | 0.691 | 0.718 | 0.684 | 0.752 |
| HGT | 0.780 | 0.762 | 0.766 | 0.761 | 0.784 | 0.792 | 0.779 | 0.774 | 0.767 | 0.812 |
| DREAMwalk | 0.720 | 0.616 | 0.580 | 0.646 | 0.669 | 0.737 | 0.571 | 0.582 | 0.613 | 0.630 |
| EKGDR | 0.912 | 0.883 | 0.901 | 0.906 | 0.903 | 0.894 | 0.866 | 0.883 | 0.895 | 0.901 |
| KGCNH | 0.801 | 0.786 | 0.800 | 0.778 | 0.779 | 0.813 | 0.791 | 0.801 | 0.777 | 0.787 |

**Supplementary Table 7.** Degree description of different feature.

|  | KGE feature | Pre-training feature | KGE+Pre-training feature |
| --- | --- | --- | --- |
| Count of drug | 47 | 57 | 61 |
| Mean | 1121 | 1177 | 744 |
| Std | 2338 | 2129 | 716 |
| Min | 2 | 2 | 3 |
| 25% | 91 | 226 | 196 |
| 50% | 437 | 674 | 433 |
| 75% | 886 | 1550 | 1226 |
| Max | 11552 | 15111 | 3186 |


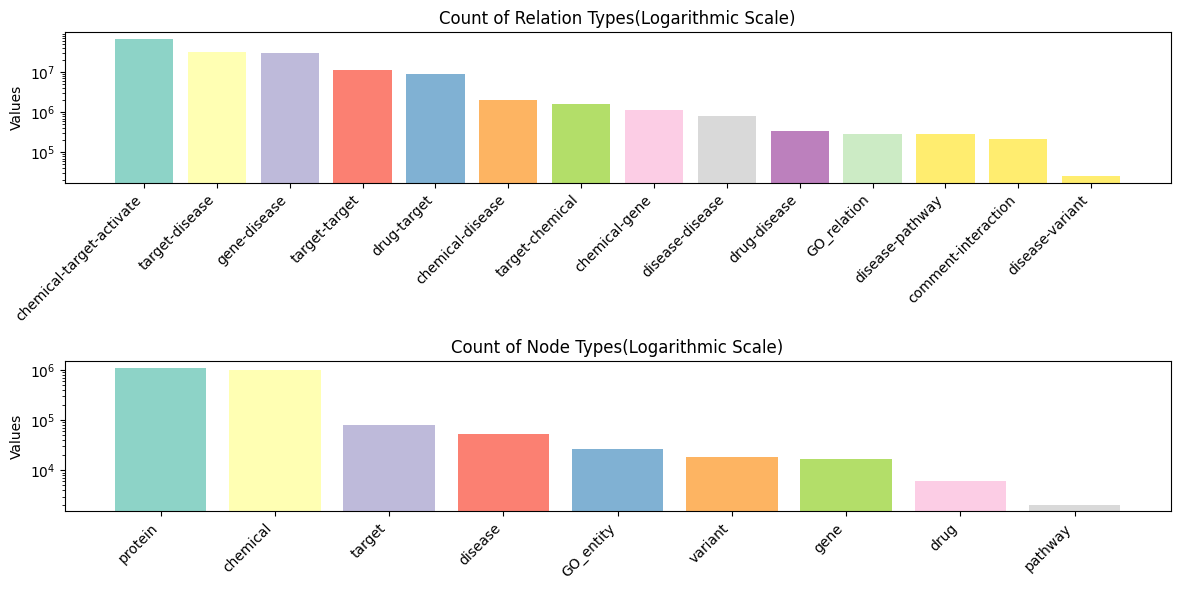


**Supplementary Fig. 1.** The distribution of the number of entities and relations of different types.


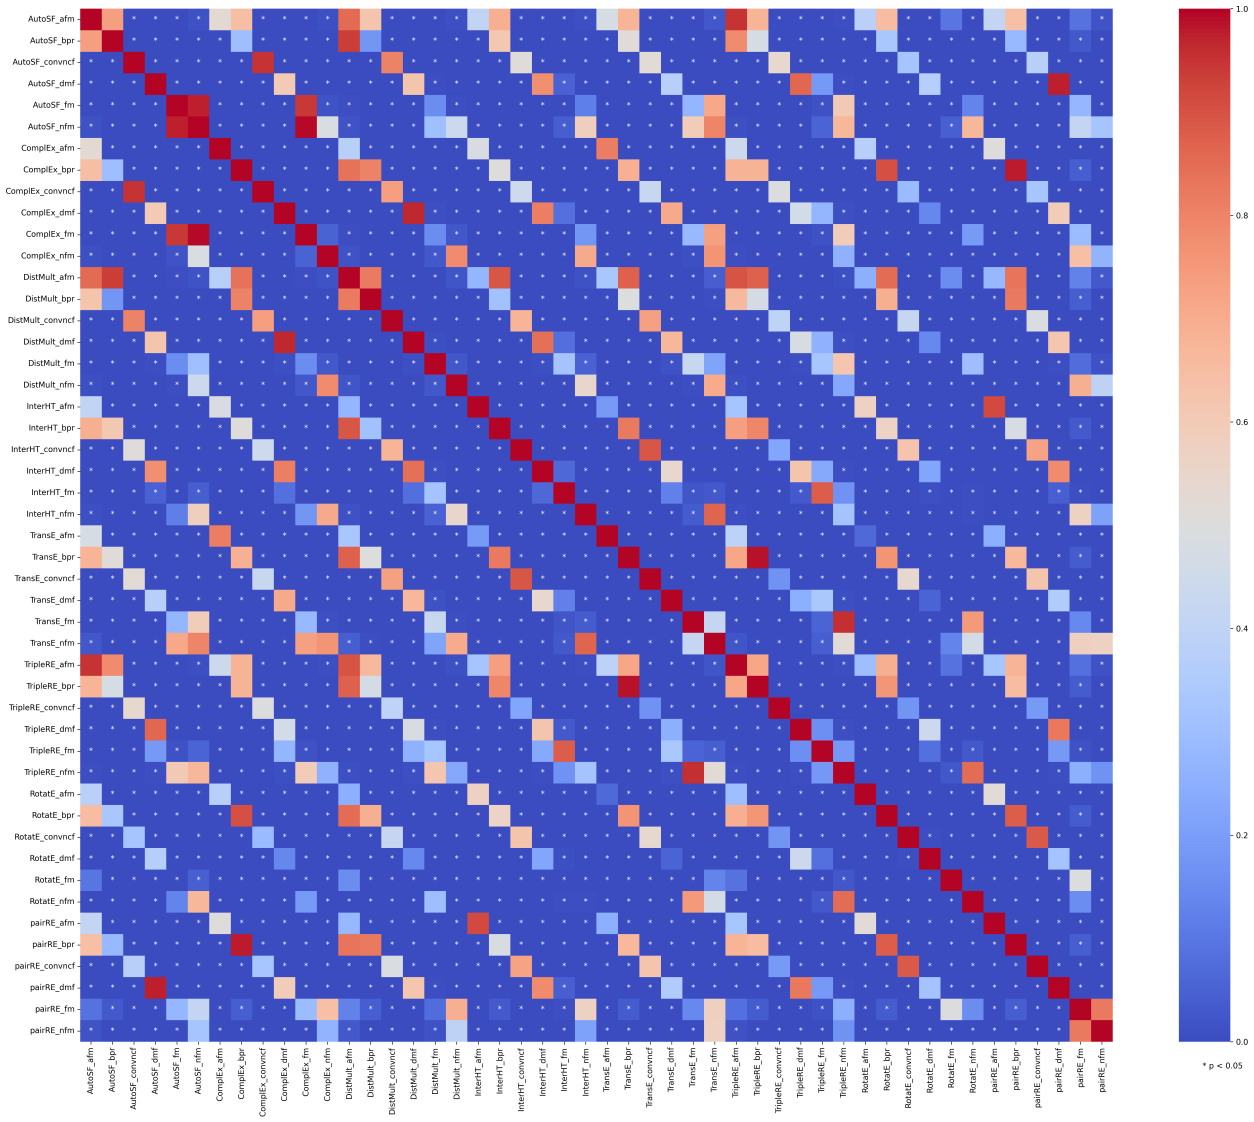


**Supplementary Fig. 2.** Statistical significance analysis of model performance using one-way ANOVA. The heatmap shows pairwise comparisons between different model configurations. Colors indicate p-values (cooler colors represent smaller p-values), and asterisks (*) mark statistically significant differences (p < 0.05) between model pairs. The diagonal represents self-comparison.


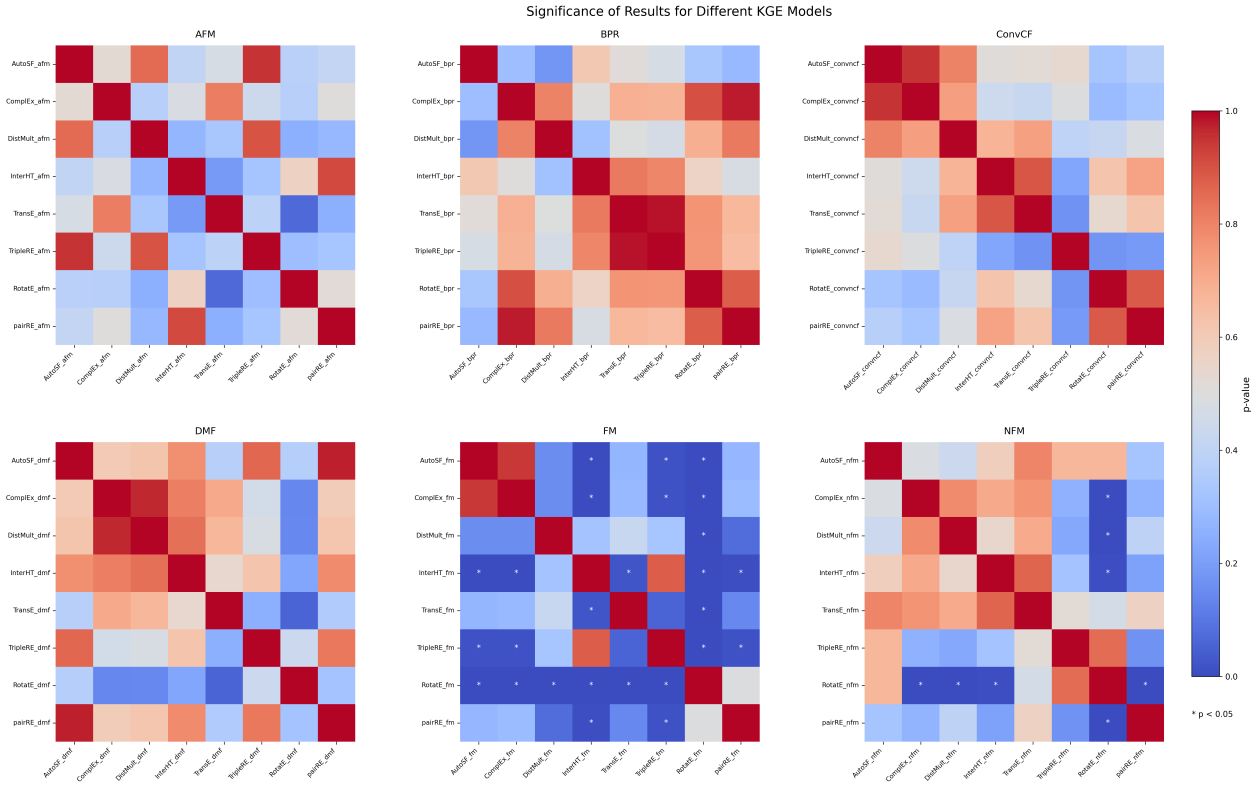


**Supplementary Fig. 3.** The significance heatmaps analyze the statistical differences between Knowledge Graph Embedding (KGE) models under six different recommendation system architectures: AFM, BPR, ConvCF, DMF, FM, and NFM. Colors indicate p-values (cooler colors represent smaller p-values), and asterisks (*) mark statistically significant differences (p < 0.05) between model pairs.


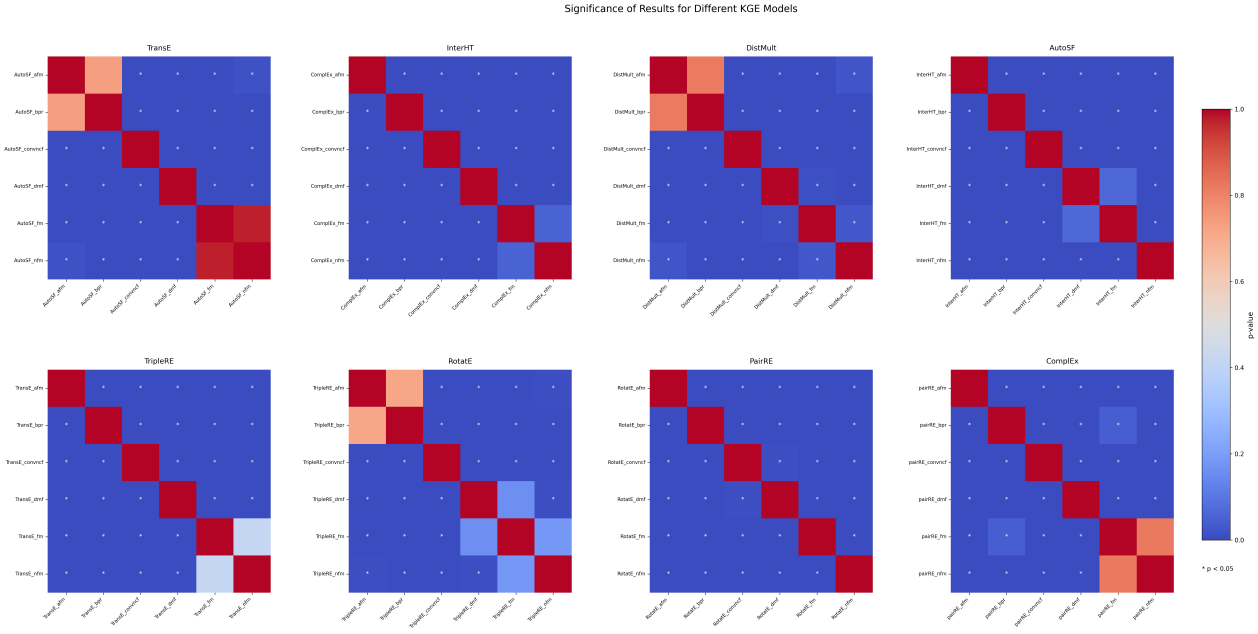


**Supplementary Fig. 4.** The significance heatmaps analyze the statistical differences between Recommendation System (RS) models based on eight distinct Knowledge Graph Embedding (KGE) architectures: TransE, InterHT, DistMult, AutoSF, TripleRE, RotatE, PairRE, and ComplEx. The color intensity in the heatmaps represents p-values from ANOVA tests, where cooler colors indicate smaller p-values. Asterisks (*) denote statistically significant differences (p < 0.05) between pairs of models, highlighting meaningful performance variations in the recommendation tasks.


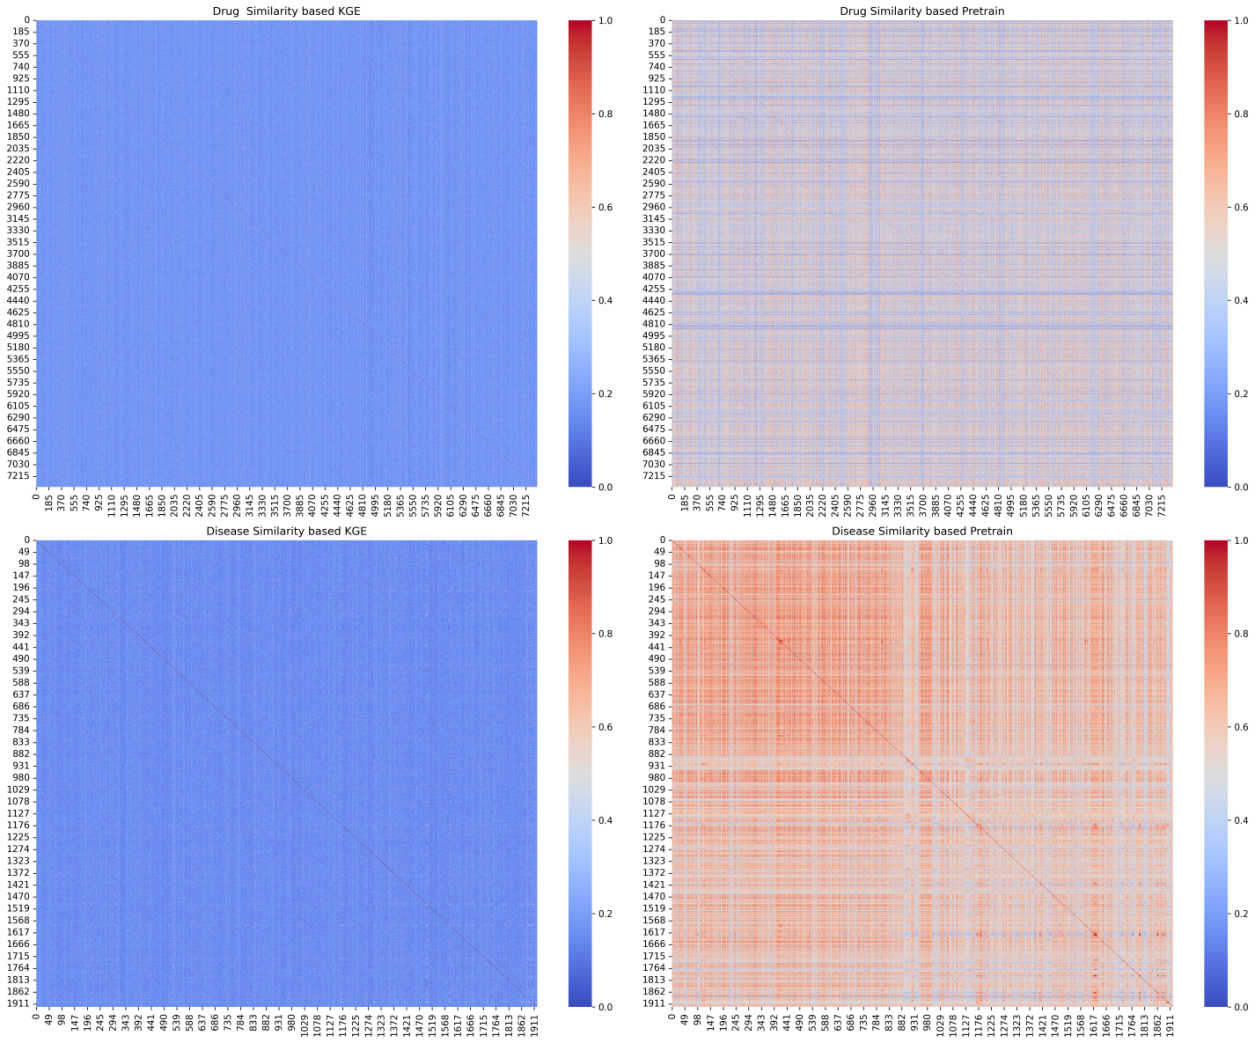


**Supplementary Fig. 5.** KGE and pre-trained feature matrix for drugs and diseases


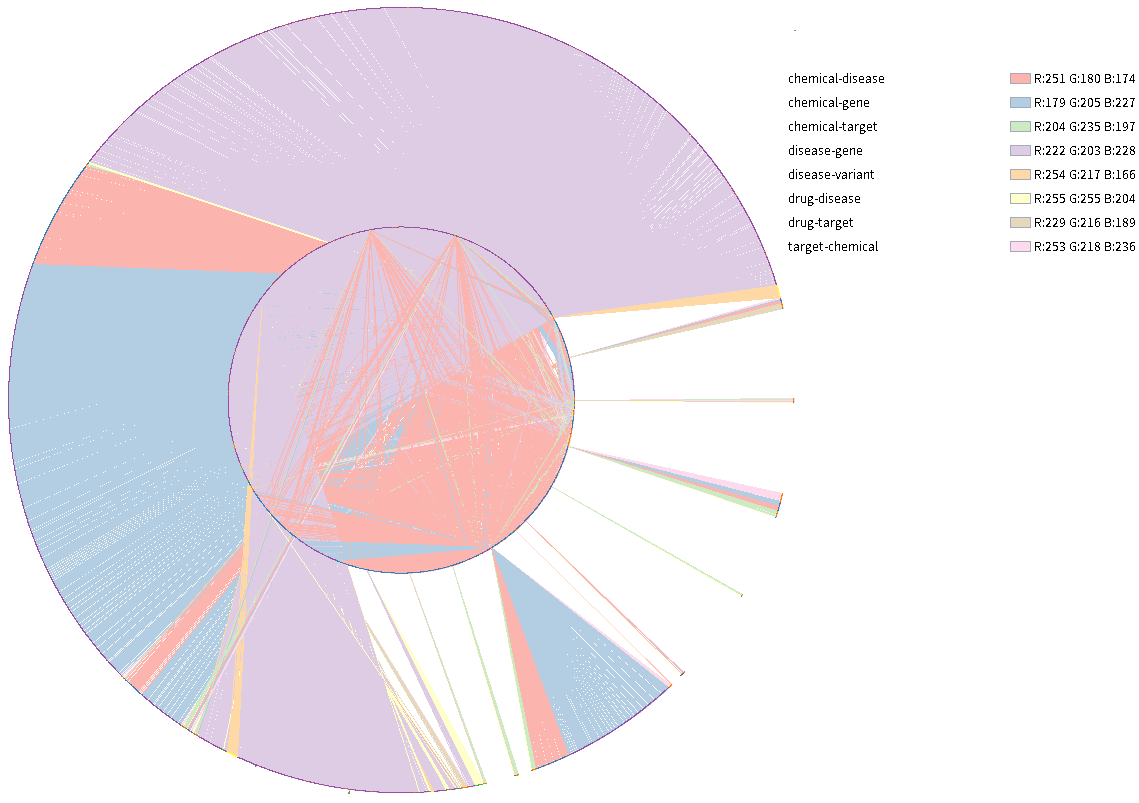


**Supplementary Fig. 6.** KGE+pretrain top20 first-order knowledge graph visualization.


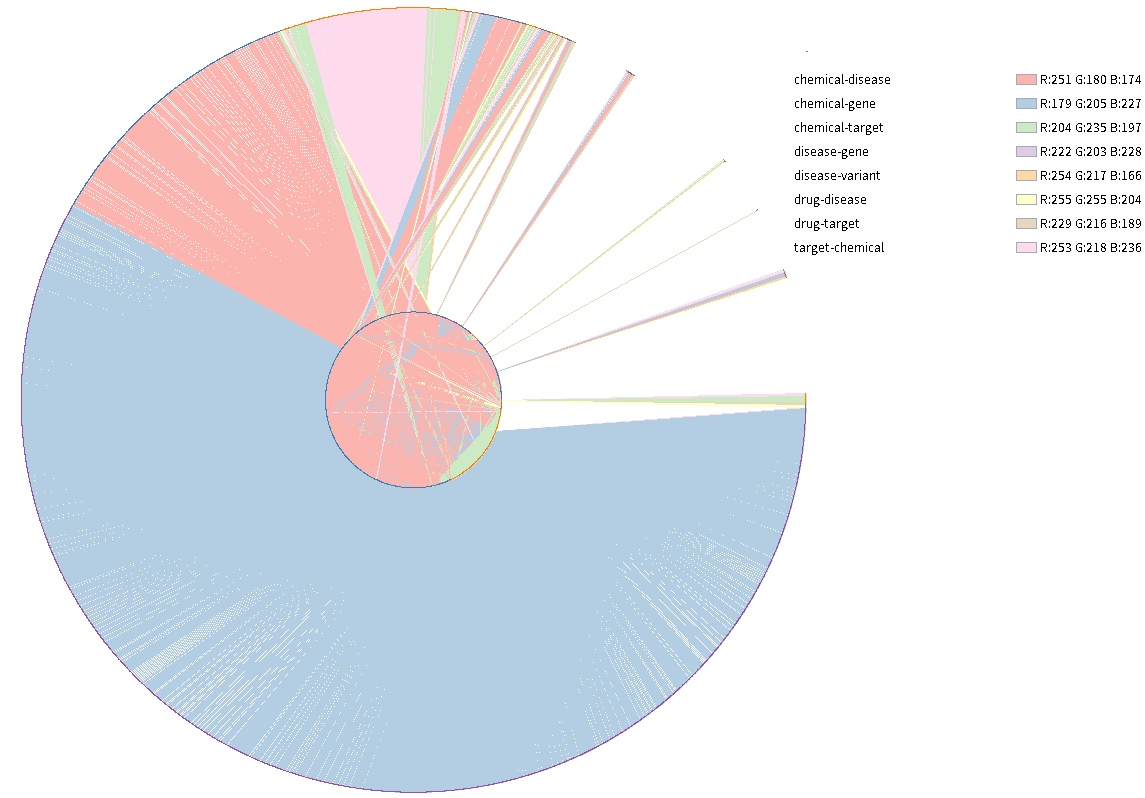


**Supplementary Fig. 7.** KGE top20 first-order knowledge graph visualization.

1. Bordes A, Usunier N, Garcia-Duran A, Weston J, Yakhnenko O. Translating Embeddings for Modeling Multi-relational Data. In: *Advances in Neural Information Processing Systems*. Vol 26. Curran Associates, Inc.; 2013. Accessed March 1, 2023. https://papers.nips.cc/paper/2013/hash/1cecc7a77928ca8133fa24680a88d2f9-Abstract.html

2. Zhang Y, Yao Q, Dai W, Chen L. AutoSF: Searching Scoring Functions for Knowledge Graph Embedding. Published online February 28, 2020. doi:10.48550/arXiv.1904.11682

3. Trouillon T, Dance CR, Welbl J, Riedel S, Gaussier É, Bouchard G. Knowledge Graph Completion via Complex Tensor Factorization. Published online November 26, 2017. doi:10.48550/arXiv.1702.06879

4. Yang B, Yih W tau, He X, Gao J, Deng L. Embedding Entities and Relations for Learning and Inference in Knowledge Bases. Published online August 29, 2015. doi:10.48550/arXiv.1412.6575

5. Chao L, He J, Wang T, Chu W. PairRE: Knowledge Graph Embeddings via Paired Relation Vectors. Published online May 18, 2021. doi:10.48550/arXiv.2011.03798

6. Yu L, Luo Z, Lin D, Li H, Liu H, Deng Y. Triplere: Knowledge Graph Embeddings Via Triple Relation Vectors. Published online December 1, 2021. Accessed November 27, 2023. https://vixra.org/abs/2112.0095

7. Sun Z, Deng ZH, Nie JY, Tang J. RotatE: Knowledge Graph Embedding by Relational Rotation in Complex Space. Published online February 26, 2019. doi:10.48550/arXiv.1902.10197

8. Wang B, Meng Q, Wang Z, et al. InterHT: Knowledge Graph Embeddings by Interaction between Head and Tail Entities. Published online December 23, 2022. doi:10.48550/arXiv.2202.04897

9. Rendle S, Freudenthaler C, Gantner Z, Schmidt-Thieme L. BPR: Bayesian personalized ranking from implicit feedback. In: *Proceedings of the Twenty-Fifth Conference on Uncertainty in Artificial Intelligence*. UAI ’09. AUAI Press; 2009:452-461.

10. He X, Du X, Wang X, Tian F, Tang J, Chua TS. Outer Product-based Neural Collaborative Filtering. Published online 2018:2227-2233.

11. Xue HJ, Dai X, Zhang J, Huang S, Chen J. Deep Matrix Factorization Models for Recommender Systems. Published online 2017:3203-3209.

12. Factorization Machines | IEEE Conference Publication | IEEE Xplore. Accessed December 18, 2023. https://ieeexplore.ieee.org/abstract/document/5694074

13. He X, Chua TS. Neural Factorization Machines for Sparse Predictive Analytics. In: *Proceedings of the 40th International ACM SIGIR Conference on Research and Development in Information Retrieval*. SIGIR ’17. Association for Computing Machinery; 2017:355-364. doi:10.1145/3077136.3080777

14. Xiao J, Ye H, He X, Zhang H, Wu F, Chua TS. Attentional Factorization Machines: Learning the Weight of Feature Interactions via Attention Networks. Published online August 15, 2017. doi:10.48550/arXiv.1708.04617

1. 1Xiangya School of Pharmaceutical Sciences, Central South University, Changsha, China

   2College of Pharmaceutical Sciences, Zhejiang University, Hangzhou, China

   3School of Computer Science, National University of Defense Technology, Changsha, China

   4Hangzhou Carbonsilicon AI Technology Co., Ltd, Hangzhou, China

   5Deparment of Computer Science, Hunan University, Changsha, China [↑](#footnote-ref-0)
